# Supplementary material
Source: ML conference proceedings conference paper supplement (https://proceedings.mlr.press/v139/gauthier21a.html)
Supplement: Supplementary file [file gauthier21a-supp.pdf]

---

# Parametric Graph for Unimodal Ranking Bandit

## Supplementary Materials

---

Camille-Sovanneary Gauthier<sup>\* 1 2</sup> Romaric Gaudel<sup>\* 3</sup> Elisa Fromont<sup>4 5 2</sup> Boammani Aser Lompo<sup>6</sup>

The appendix is organized as follows. We first list most of the notations used in the paper in Appendix A. Lemma 1 is proved in Appendix B. In Appendix C, we recall a Lemma from (Combes & Proutière, 2014) used by our own Lemmas and Theorems, and then in Appendices D to F we respectively prove Theorem 2, Lemma 2, and Lemma 3. In Appendix G we define KL-CombUCB and discuss its regret and its relation to GRAB. Finally in Appendix H we introduce and discuss S-GRAB.

### A. Notations

The following table summarize the notations used through the paper and the appendix.

| SYMBOL                                 | MEANING                                                                                                          |
|----------------------------------------|------------------------------------------------------------------------------------------------------------------|
| $T$                                    | TIME HORIZON                                                                                                     |
| $t$                                    | ITERATION                                                                                                        |
| $L$                                    | NUMBER OF ITEMS                                                                                                  |
| $i$                                    | INDEX OF AN ITEM                                                                                                 |
| $K$                                    | NUMBER OF POSITIONS IN A RECOMMENDATION                                                                          |
| $k$                                    | INDEX OF A POSITION                                                                                              |
| $[n]$                                  | SET OF INTEGERS $\{1, \dots, n\}$                                                                                |
| $\mathcal{P}_K^L$                      | SET OF PERMUTATIONS OF $K$ DISTINCT ITEMS AMONG $L$                                                              |
| $\theta$                               | VECTORS OF PROBABILITIES OF CLICK                                                                                |
| $\theta_i$                             | PROBABILITY OF CLICK ON ITEM $i$                                                                                 |
| $\kappa$                               | VECTORS OF PROBABILITIES OF VIEW                                                                                 |
| $\kappa_k$                             | PROBABILITY OF VIEW AT POSITION $k$                                                                              |
| $\mathcal{A}$                          | SET OF BANDIT ARMS                                                                                               |
| $\mathbf{a}$                           | AN ARM IN $\mathcal{A}$                                                                                          |
| $\mathbf{a}(t)$                        | THE ARM CHOSEN AT ITERATION $t$                                                                                  |
| $\tilde{\mathbf{a}}(t)$                | BEST ARM AT ITERATION $t$ GIVEN THE PREVIOUS CHOICES AND FEEDBACKS (CALLED LEADER)                               |
| $\mathbf{a}^*$                         | BEST ARM                                                                                                         |
| $G$                                    | GRAPH CARRYING A PARTIAL ORDER ON $\mathcal{A}$                                                                  |
| $\gamma$                               | MAXIMUM DEGREE OF $G$                                                                                            |
| $\mathcal{N}_G(\tilde{\mathbf{a}}(t))$ | NEIGHBORHOOD OF $\tilde{\mathbf{a}}(t)$ GIVEN $G$                                                                |
| $\rho_{i,k}$                           | PROBABILITY OF CLICK ON ITEM $i$ DISPLAYED AT POSITION $k$                                                       |
| $\mathbf{c}(t)$                        | CLICKS VECTOR AT ITERATION $t$                                                                                   |
| $r(t)$                                 | REWARD COLLECTED AT ITERATION $t$ , $r(t) = \sum_{k=1}^K c_k(t)$                                                 |
| $\mu_{\mathbf{a}}$                     | EXPECTATION OF $r(t)$ WHILE RECOMMENDING $\mathbf{a}$ , $\mu_{\mathbf{a}} = \sum_{k=1}^K \rho_{\mathbf{a}_k, k}$ |
| $\mu^*$                                | HIGHEST EXPECTED REWARD, $\mu^* = \max_{\mathbf{a} \in \mathcal{P}_K^L} \mu_{\mathbf{a}}$                        |
| $\Delta_{\mathbf{a}}$                  | GAP BETWEEN $\mu_{\mathbf{a}}$ AND $\mu^*$                                                                       |
| $\Delta_{min}$                         | MINIMAL VALUE FOR $\Delta_{\mathbf{a}}$                                                                          |
| $\Delta$                               | GENERIC REWARD GAP BETWEEN ONE OF THE SUB-OPTIMAL ARMS AND ONE OF THE BEST ARMS                                  |

CONTINUED ON NEXT PAGE

---

<sup>\*</sup>Equal contribution <sup>1</sup>Louis Vuitton, F-75001 Paris, France <sup>2</sup>IRISA UMR 6074 / INRIA rba, F-35000 Rennes, France <sup>3</sup>Univ Rennes, Ensai, CNRS, CREST - UMR 9194, F-35000 Rennes, France <sup>4</sup>Univ. Rennes 1, F-35000 Rennes, France <sup>5</sup>Institut Universitaire de France, M.E.S.R.I., F-75231 Paris <sup>6</sup>ENS Rennes, F-35000 Rennes, France. Correspondence to: Camille-Sovanneary Gauthier <camille-sovanneary.gauthier@louisvuitton.com>.

**Parametric Graph for Unimodal Ranking Bandit (Supplementary Materials)**

| <b>SYMBOL</b>                            | <b>MEANING</b>                                                                                                                                                                                                                                                                                                                                                                        |
|------------------------------------------|---------------------------------------------------------------------------------------------------------------------------------------------------------------------------------------------------------------------------------------------------------------------------------------------------------------------------------------------------------------------------------------|
| $R(T)$                                   | CUMULATIVE (PSEUDO-)REGRET, $R(T) = T\mu^* - \mathbb{E} \left[ \sum_{t=1}^T \mu_{\mathbf{a}(t)} \right]$                                                                                                                                                                                                                                                                              |
| $\Pi_{\rho}(\mathbf{a})$                 | SET OF PERMUTATIONS IN $\mathcal{P}_K^K$ ORDERING THE POSITIONS S.T. $\rho_{a_{\pi_1}, \pi_1} \geq \rho_{a_{\pi_2}, \pi_2} \geq \dots \geq \rho_{a_{\pi_K}, \pi_K}$                                                                                                                                                                                                                   |
| $\pi$                                    | ELEMENT OF $\Pi_{\rho}(\mathbf{a})$                                                                                                                                                                                                                                                                                                                                                   |
| $\tilde{\pi}$                            | ESTIMATION OF $\pi$                                                                                                                                                                                                                                                                                                                                                                   |
| $\mathbf{a} \circ (\pi_k, \pi_{k+1})$    | PERMUTATION SWAPPING ITEMS IN POSITIONS $\pi_k$ AND $\pi_{k+1}$                                                                                                                                                                                                                                                                                                                       |
| $\mathbf{a}[\pi_K := i]$                 | PERMUTATION LEAVING $\mathbf{a}$ THE SAME FOR ANY POSITION EXCEPT $\pi_K$ FOR WHICH $\mathbf{a}[\pi_K := i]_{\pi_K} = i$                                                                                                                                                                                                                                                              |
| $\mathcal{F}$                            | RANKINGS OF POSITIONS RESPECTING $\Pi_{\rho}$ , $\mathcal{F} = (\pi_{\mathbf{a}})_{\mathbf{a} \in \mathcal{P}_K^K}$ S.T. $\forall \mathbf{a} \in \mathcal{P}_K^K, \pi_{\mathbf{a}} \in \Pi_{\rho}(\mathbf{a})$                                                                                                                                                                        |
| $T_{i,k}(t)$                             | NUMBER OF ITERATIONS S.T. ITEM $i$ HAS BEEN DISPLAYED AT POSITION $k$ , $T_{i,k}(t) = \sum_{s=1}^{t-1} \mathbb{1}\{a_k(s) = i\}$                                                                                                                                                                                                                                                      |
| $\tilde{T}_{\mathbf{a}}(t)$              | NUMBER OF ITERATIONS S.T. THE LEADER WAS $\mathbf{a}$ , $\tilde{T}_{\mathbf{a}}(t) \stackrel{def}{=} \sum_{s=1}^{t-1} \mathbb{1}\{\tilde{\mathbf{a}}(s) = \mathbf{a}\}$                                                                                                                                                                                                               |
| $T_{\mathbf{a}}(t)$                      | NUMBER OF ITERATIONS S.T. THE CHOSEN ARM WAS $\mathbf{a}$ , $T_{\mathbf{a}}(t) = \sum_{s=1}^{t-1} \mathbb{1}\{\mathbf{a}(s) = \mathbf{a}\}$                                                                                                                                                                                                                                           |
| $T_{\tilde{\mathbf{a}}}^{\mathbf{a}}(t)$ | NUMBER OF ITERATIONS S.T. THE LEADER WAS $\tilde{\mathbf{a}}$ , THE CHOSEN ARM WAS $\mathbf{a}$ , AND $\mathbf{a}$ WAS CHOSEN BY THE ARGMAX ON $\sum_{k=1}^K b_{a_k, k}(t)$ : $T_{\tilde{\mathbf{a}}}^{\mathbf{a}}(t) = \sum_{s=1}^{t-1} \mathbb{1}\{\tilde{\mathbf{a}}(s) = \tilde{\mathbf{a}}, \mathbf{a}(s) = \mathbf{a}, \tilde{T}_{\tilde{\mathbf{a}}}(s)/L \notin \mathbb{N}\}$ |
| $\hat{\rho}_{i,k}(t)$                    | ESTIMATION OF $\rho_{i,k}$ AT ITERATION $t$ , $\hat{\rho}_{i,k}(t) = \frac{1}{T_{i,k}(t)} \sum_{s=1}^{t-1} \mathbb{1}\{a_k(s) = i\} c_k(s)$                                                                                                                                                                                                                                           |
| $b_{i,k}(t)$                             | KULLBACK-LEIBLER INDEX OF $\hat{\rho}_{i,k}(t)$ , $b_{i,k}(t) = f(\hat{\rho}_{i,k}(t), T_{i,k}(t), \tilde{T}_{\tilde{\mathbf{a}}}(t) + 1)$                                                                                                                                                                                                                                            |
| $f$                                      | KULLBACK-LEIBLER INDEX FUNCTION, $f(\hat{\rho}, s, t) = \sup\{p \in [\hat{\rho}, 1] : s \times \text{kl}(\hat{\rho}, p) \leq \log(t) + 3 \log(\log(t))\}$ ,                                                                                                                                                                                                                           |
| $\text{kl}(p, q)$                        | KULLBACK-LEIBLER DIVERGENCE FROM A BERNOULLI DISTRIBUTION OF MEAN $p$ TO A BERNOULLI DISTRIBUTION OF MEAN $q$ , $\text{kl}(p, q) = p \log\left(\frac{p}{q}\right) + (1-p) \log\left(\frac{1-p}{1-q}\right)$                                                                                                                                                                           |
| $B_{\mathbf{a}}(t)$                      | PSEUDO-SUM OF INDICES OF $\mathbf{a}$ AT ITERATION $t$ , $B_{\mathbf{a}}(t) = \sum_{k=1}^K b_{a_k, k}(t) - \sum_{k=1}^K b_{\tilde{a}_k(t), k}(t)$                                                                                                                                                                                                                                     |
| $\mathcal{N}_{\pi^*}(\mathbf{a}^*)$      | NEIGHBORHOOD OF THE BEST ARM                                                                                                                                                                                                                                                                                                                                                          |
| $K_{\mathbf{a}}$                         | (WITH COMBINATORIAL BANDIT SETTING) NUMBER OF ELEMENTS IN $\mathbf{a}$ BUT NOT IN $\mathbf{a}^*$ , $K_{\mathbf{a}} = \min_{\mathbf{a}^* \in \mathcal{A}: \mu_{\mathbf{a}^*} = \mu^*}  \mathbf{a} \setminus \mathbf{a}^* $                                                                                                                                                             |
| $K_{max}$                                | (WITH COMBINATORIAL BANDIT SETTING) MAXIMAL NUMBER OF ELEMENTS IN A SUB-OPTIMAL ARM $\mathbf{a}$ BUT NOT IN AN OPTIMAL ARM $\mathbf{a}^*$ , $K_{max} = \max_{\mathbf{a} \in \mathcal{A}: \mu_{\mathbf{a}} \neq \mu^*} K_{\mathbf{a}}$                                                                                                                                                 |
| $c^*(\theta, \kappa)$                    | COEFFICIENT IN THE REGRET BOUND OF PMED                                                                                                                                                                                                                                                                                                                                               |
| $c$                                      | (IN $\epsilon_n$ -GREEDY) PARAMETER CONTROLLING THE PROBABILITY OF EXPLORATION                                                                                                                                                                                                                                                                                                        |
| $c$                                      | (IN PB-MHB) PARAMETER CONTROLLING SIZE OF THE STEP IN THE METROPOLIS HASTING INFERENCE                                                                                                                                                                                                                                                                                                |
| $m$                                      | (IN PB-MHB) NUMBER OF STEP IN THE METROPOLIS HASTING INFERENCE                                                                                                                                                                                                                                                                                                                        |

## References to Theorems

**Lemma 1** (PBM Fulfills Assumption 1).

**Theorem 1** (Upper-Bound on the Regret of GRAB).

**Theorem 2** (Upper-Bound on the Regret of KL-CombUCB).

**Lemma 2** (Upper-Bound on the Number of Iterations of GRAB for which  $\tilde{\mathbf{a}}(t) = \tilde{\mathbf{a}} \neq \mathbf{a}^*$ ).

**Lemma 3** (Upper-Bound on the Number of Iterations of GRAB for which  $\tilde{\pi}(t) \notin \Pi_{\rho}(\tilde{\mathbf{a}})$ ).

## B. Proof of Lemma 1 (PBM Fulfills Assumption 1)

*Proof of Lemma 1.* Let  $(L, K, (\rho_{i,k})_{(i,k) \in [L] \times [K]})$  be an online learning to rank (OLR) problem with users following PBM, with positive probabilities of looking at a given position. Therefore, there exists  $\theta \in [0, 1]^L$  and  $\kappa \in (0, 1]^K$  such that for any item  $i$  and any position  $k$ ,  $\rho_{i,k} = \theta_i \kappa_k$ .

Let  $\mathbf{a} \in \mathcal{P}_K^K$  be a recommendation, and let  $\pi \in \Pi_{\rho}(\mathbf{a})$  be an appropriate ranking of positions. One of the four following

properties is satisfied:

$$\exists k \in [K-1] \text{ s.t. } \theta_{a_{\pi_k}} < \theta_{a_{\pi_{k+1}}}, \quad (7)$$

$$\exists k \in [K-1] \text{ s.t. } \kappa_{\pi_k} < \kappa_{\pi_{k+1}}, \quad (8)$$

$$\exists i \in [L] \setminus \mathbf{a}([K]) \text{ s.t. } \theta_{a_{\pi_K}} < \theta_i, \quad (9)$$

$$\begin{cases} \forall k \in [K-1], \theta_{a_{\pi_k}} \geq \theta_{a_{\pi_{k+1}}} \\ \forall k \in [K-1], \kappa_{\pi_k} \geq \kappa_{\pi_{k+1}} \\ \forall i \in [L] \setminus \mathbf{a}([K]), \theta_{a_{\pi_K}} \geq \theta_i \end{cases}. \quad (10)$$

Let prove, by considering each of these properties one by one, that  $\mathbf{a}$  is either one of the best arms, or  $\mathbf{a}$  fulfills either Property (2) or Property (3) of Assumption 1.

If Property (7) is satisfied and  $\theta_{a_{\pi_k}} = 0$ , then by definition of  $\boldsymbol{\pi}$  and  $\Pi_{\boldsymbol{\rho}}(\mathbf{a})$ ,  $0 = \theta_{a_{\pi_k}} \kappa_{\pi_k} \geq \theta_{a_{\pi_{k+1}}} \kappa_{\pi_{k+1}} > 0$  which is absurd.

Therefore, If Property (7) is satisfied,  $\frac{\theta_{a_{\pi_{k+1}}}}{\theta_{a_{\pi_k}}} > 1$ .

Note that by definition of  $\boldsymbol{\pi}$  and  $\Pi_{\boldsymbol{\rho}}(\mathbf{a})$ , and as  $\rho_{i,k} = \theta_i \kappa_k$ ,  $\theta_{a_{\pi_k}} \kappa_{\pi_k} \geq \theta_{a_{\pi_{k+1}}} \kappa_{\pi_{k+1}}$ .

Hence  $\kappa_{\pi_k} \geq \frac{\theta_{a_{\pi_{k+1}}}}{\theta_{a_{\pi_k}}} \kappa_{\pi_{k+1}} > \kappa_{\pi_{k+1}}$ , and

$$\begin{aligned} \mu_{\mathbf{a}} - \mu_{\mathbf{a} \circ (\pi_k, \pi_{k+1})} &= \theta_{a_{\pi_k}} \kappa_{\pi_k} + \theta_{a_{\pi_{k+1}}} \kappa_{\pi_{k+1}} - \left( \theta_{a_{\pi_{k+1}}} \kappa_{\pi_k} + \theta_{a_{\pi_k}} \kappa_{\pi_{k+1}} \right) \\ &= \left( \theta_{a_{\pi_k}} - \theta_{a_{\pi_{k+1}}} \right) \left( \kappa_{\pi_k} - \kappa_{\pi_{k+1}} \right) \\ &< 0, \end{aligned}$$

meaning  $\mu_{\mathbf{a}} < \mu_{\mathbf{a} \circ (\pi_k, \pi_{k+1})}$ , which corresponds to Property (2) of Assumption 1.

Similarly, if Property (8) is satisfied, then Property (2) of Assumption 1 is fulfilled.

If Property (9) is satisfied,

$$\begin{aligned} \mu_{\mathbf{a}} - \mu_{\mathbf{a}[\pi_K := i]} &= \theta_{a_{\pi_K}} \kappa_{\pi_K} - \theta_i \kappa_{\pi_K} \\ &= \left( \theta_{a_{\pi_K}} - \theta_i \right) \kappa_{\pi_K} \\ &< 0. \end{aligned}$$

Hence  $\mu_{\mathbf{a}} < \mu_{\mathbf{a}[\pi_K := i]}$ , which corresponds to Property (3) of Assumption 1.

Finally, if Property (10) is satisfied,  $\mu_{\mathbf{a}} = \mu^*$ .

Overall, either  $\mathbf{a}$  is one of the best arms, or  $\mathbf{a}$  fulfills Property (2) of Assumption 1, or  $\mathbf{a}$  fulfills Property (3) of Assumption 1, which concludes the proof.  $\square$

## C. Preliminary to the Analysis of GRAB

The analysis of GRAB requires a control of the number of high deviations, as expressed by Lemma B.1 of (Combes & Proutière, 2014). Let us recall this lemma, which we denote Lemma 4 in current paper.

**Lemma 4** (Lemma B.1 of (Combes & Proutière, 2014)). *Let  $i \in [L]$ ,  $k \in [K]$ ,  $\epsilon > 0$ . Define  $\mathcal{F}(T)$  the  $\sigma$ -algebra generated by  $(\mathbf{c}(t))_{t \in [T]}$ . Let  $\Lambda \subseteq \mathbb{N}$  be a random set of instants. Assume that there exists a sequence of random sets  $(\Lambda(s))_{s \geq 1}$  such that (i)  $\Lambda \subseteq \bigcup_{s \geq 1} \Lambda(s)$ , (ii) for all  $s \geq 1$  and all  $t \in \Lambda(s)$ ,  $T_{i,k}(t) \geq \epsilon s$ , (iii)  $|\Lambda(s)| \leq 1$ , and (iv) the event  $t \in \Lambda(s)$  is  $\mathcal{F}_t$ -measurable. Then for all  $\delta > 0$ ,*

$$\mathbb{E} \left[ \sum_{t \geq 1} \mathbb{1}\{t \in \Lambda, |\hat{\rho}_{i,k}(t) - \rho_{i,k}| \geq \delta\} \right] \leq \frac{1}{\epsilon \delta^2}$$

## D. Proof of Theorem 2 (Upper-bound on the Regret of KL-CombUCB)

*Proof of Theorem 2.* Let  $\mathbf{a} \in \mathcal{A}$  be a sub-optimal arm. Let  $\mathbf{a}^* \in \mathcal{A}$  be an optimal arm such that  $|\mathbf{a} \setminus \mathbf{a}^*| = K_{\mathbf{a}}$ .

We denote  $\bar{K}_{\mathbf{a}} \stackrel{\text{def}}{=} |\mathbf{a}^* \setminus \mathbf{a}|$ ,  $T_{\mathbf{a}}(t) \stackrel{\text{def}}{=} \sum_{s=1}^{t-1} \mathbb{1}\{\mathbf{a}(s) = \mathbf{a}\}$  the number of time the arm  $\mathbf{a}$  has been drawn, and  $T_e(t) \stackrel{\text{def}}{=} \sum_{s=1}^{t-1} \mathbb{1}\{e \in \mathbf{a}(s)\}$  the number of time the element  $e$  was in the drawn arm.

Let decompose the expected number of iterations at which the permutation  $\mathbf{a}$  is recommended:

$$\begin{aligned} \mathbb{E} \left[ \sum_{t=1}^T \mathbb{1}\{\mathbf{a}(t) = \mathbf{a}\} \right] &\leq \sum_{e \in \mathbf{a} \setminus \mathbf{a}^*} \mathbb{E} \left[ \sum_{t=1}^T \mathbb{1} \left\{ \mathbf{a}(t) = \mathbf{a}, |\hat{\rho}_e(t) - \rho_e| \geq \frac{\Delta_{\mathbf{a}}}{2K_{\mathbf{a}}} \right\} \right] \\ &+ \sum_{e \in \mathbf{a}^* \setminus \mathbf{a}} \mathbb{E} \left[ \sum_{t=1}^T \mathbb{1}\{b_e(t) \leq \rho_e\} \right] \\ &+ \mathbb{E} \left[ \sum_{t=|E|}^T \mathbb{1} \left\{ \mathbf{a}(t) = \mathbf{a}, \forall e \in \mathbf{a} \setminus \mathbf{a}^*, |\hat{\rho}_e(t) - \rho_e| < \frac{\Delta_{\mathbf{a}}}{2K_{\mathbf{a}}}, \forall e \in \mathbf{a}^* \setminus \mathbf{a}, b_e(t) > \rho_e \right\} \right] \\ &+ |E|. \end{aligned}$$

The proof consists in upper-bounding each term on the right-hand side.

**First Term** Let  $e \in \mathbf{a} \setminus \mathbf{a}^*$ , and denote  $A_e = \left\{ t \in [T] : \mathbf{a}(t) = \mathbf{a}, |\hat{\rho}_e(t) - \rho_e| \geq \frac{\Delta_{\mathbf{a}}}{2K_{\mathbf{a}}} \right\}$ .

$A_e \subseteq \bigcup_{s \in \mathbb{N}} \Lambda_k(s)$ , where  $\Lambda_k(s) \stackrel{\text{def}}{=} \{t \in A_e : T_{\mathbf{a}}(t) = s\}$ . For any integer value  $s$ ,  $|\Lambda_k(s)| \leq 1$  as  $T_{\mathbf{a}}(t)$  increases for each  $t \in A_e$ . Note that for each  $s \in \mathbb{N}$  and  $n \in \Lambda_k(s)$ ,  $T_e(n) \geq T_{\mathbf{a}}(n) = s$ . Then, by Lemma 4

$$\begin{aligned} \mathbb{E}[|A_e|] &\leq \mathbb{E} \left[ \sum_{t=1}^T \mathbb{1}\{t \in A_e\} \right] \\ &= \mathbb{E} \left[ \sum_{t=1}^T \mathbb{1} \left\{ t \in A_e, |\hat{\rho}_e(t) - \rho_e| \geq \frac{\Delta_{\mathbf{a}}}{2K_{\mathbf{a}}} \right\} \right] \\ &\leq \frac{4K_{\mathbf{a}}^2}{\Delta_{\mathbf{a}}^2}. \end{aligned}$$

Hence,  $\sum_{e \in \mathbf{a} \setminus \mathbf{a}^*} \mathbb{E} \left[ \sum_{t=1}^T \mathbb{1} \left\{ \mathbf{a}(t) = \mathbf{a}, |\hat{\rho}_e(t) - \rho_e| \geq \frac{\Delta_{\mathbf{a}}}{2K_{\mathbf{a}}} \right\} \right] = \sum_{e \in \mathbf{a} \setminus \mathbf{a}^*} \mathbb{E}[|A_e|] \leq \frac{4K_{\mathbf{a}}^3}{\Delta_{\mathbf{a}}^2}$ .

**Second Term** Let  $e \in \mathbf{a}^* \setminus \mathbf{a}$ , and denote  $B_e \stackrel{\text{def}}{=} \{t \in [T] : b_e(t) \leq \rho_e\}$ .

By Theorem 10 of (Garivier & Cappé, 2011),  $\mathbb{E}[|B_e|] = O(\log \log T)$ , so  $\sum_{e \in \mathbf{a}^* \setminus \mathbf{a}} \mathbb{E} \left[ \sum_{t=1}^T \mathbb{1}\{b_e(t) \leq \rho_e\} \right] = \mathcal{O}(\bar{K}_{\mathbf{a}} \log \log T)$ .

**Third Term** Let note  $C \stackrel{\text{def}}{=} \left\{ t \in [T] \setminus |E| : \mathbf{a}(t) = \mathbf{a}, \forall e \in \mathbf{a} \setminus \mathbf{a}^*, |\hat{\rho}_e(t) - \rho_e| < \frac{\Delta_{\mathbf{a}}}{2K_{\mathbf{a}}}, \forall e \in \mathbf{a}^* \setminus \mathbf{a}, b_e(t) > \rho_e \right\}$ .

Let  $t \in C$ .

At each step of the initialization phase, the algorithm removes at least one element  $e$  of the set  $\tilde{E}$  of unseen elements. Therefore, the initialization lasts at most  $|E|$  iterations. Hence, at iteration  $t$ ,  $\mathbf{a}(t) = \mathbf{a}$  is chosen as  $\sum_{e \in \mathbf{a}} b_e(t) = \max_{\mathbf{a}' \in \mathcal{A}} \sum_{e \in \mathbf{a}'} b_e(t)$ .

Then, by Pinsker's inequality and the fact that  $t \leq T$ , and  $T_e(t) \geq T_{\mathbf{a}}(t)$  for any  $e$  in  $\mathbf{a}$ ,

$$\begin{aligned}
 0 &\leq \sum_{e \in \mathbf{a}} b_e(t) - \sum_{e \in \mathbf{a}^*} b_e(t) \\
 &= \sum_{e \in \mathbf{a} \setminus \mathbf{a}^*} b_e(t) - \sum_{e \in \mathbf{a}^* \setminus \mathbf{a}} b_e(t) \\
 &\leq \sum_{e \in \mathbf{a} \setminus \mathbf{a}^*} \hat{\rho}_e(t) + \sqrt{\frac{\log(t) + 3 \log(\log(t))}{2T_e(t)}} - \sum_{e \in \mathbf{a}^* \setminus \mathbf{a}} b_e(t) \\
 &< \sum_{e \in \mathbf{a} \setminus \mathbf{a}^*} \rho_e + \frac{\Delta_{\mathbf{a}}}{2K_{\mathbf{a}}} + \sqrt{\frac{\log(T) + 3 \log(\log(T))}{2T_{\mathbf{a}}(t)}} - \sum_{e \in \mathbf{a}^* \setminus \mathbf{a}} \rho_e \\
 &\leq \sum_{e \in \mathbf{a}} \rho_e - \sum_{e \in \mathbf{a}^*} \rho_e + K_{\mathbf{a}} \frac{\Delta_{\mathbf{a}}}{2K_{\mathbf{a}}} + K_{\mathbf{a}} \sqrt{\frac{\log(T) + 3 \log(\log(T))}{2T_{\mathbf{a}}(t)}} \\
 &= -\Delta_{\mathbf{a}} + \frac{2\Delta_{\mathbf{a}}}{2} + K_{\mathbf{a}} \sqrt{\frac{\log(T) + 3 \log(\log(T))}{2T_{\mathbf{a}}(t)}} \\
 &= -\frac{\Delta_{\mathbf{a}}}{2} + K_{\mathbf{a}} \sqrt{\frac{\log(T) + 3 \log(\log(T))}{2T_{\mathbf{a}}(t)}}.
 \end{aligned}$$

Hence,  $T_{\mathbf{a}}(t) < K_{\mathbf{a}}^2 \frac{2 \log(T) + 6 \log(\log(T))}{\Delta_{\mathbf{a}}^2}$ . Therefore,  $C \subseteq \left\{ t \in [T] \setminus [|E|] : \mathbf{a}(t) = \mathbf{a}, T_{\mathbf{a}}(t) < K_{\mathbf{a}}^2 \frac{2 \log(T) + 6 \log(\log(T))}{\Delta_{\mathbf{a}}^2} \right\}$ , and

$$\begin{aligned}
 &\mathbb{E} \left[ \sum_{t=|E|}^T \mathbb{1} \left\{ \mathbf{a}(t) = \mathbf{a}, \forall e \in \mathbf{a} \setminus \mathbf{a}^*, |\hat{\rho}_e(t) - \rho_e| < \frac{\Delta_{\mathbf{a}}}{2K_{\mathbf{a}}}, \forall e \in \mathbf{a}^* \setminus \mathbf{a}, b_e(t) > \rho_e \right\} \right] \\
 &= \mathbb{E}[|C|] \\
 &\leq \mathbb{E} \left[ \left| \left\{ t \in [T] \setminus [|E|] : \mathbf{a}(t) = \mathbf{a}, T_{\mathbf{a}}(t) < K_{\mathbf{a}}^2 \frac{2 \log(T) + 6 \log(\log(T))}{\Delta_{\mathbf{a}}^2} \right\} \right| \right] \\
 &\leq K_{\mathbf{a}}^2 \frac{2 \log(T) + 6 \log(\log(T))}{\Delta_{\mathbf{a}}^2}.
 \end{aligned}$$

**Regret upper-bound** Overall,

$$\begin{aligned}
 \mathbb{E} \left[ \sum_{t=1}^T \mathbb{1} \{ \mathbf{a}(t) = \mathbf{a} \} \right] &\leq \frac{4K_{\mathbf{a}}^3}{\Delta_{\mathbf{a}}^2} + \mathcal{O}(\bar{K}_{\mathbf{a}} \log \log T) + K_{\mathbf{a}}^2 \frac{2 \log(T) + 6 \log(\log(T))}{\Delta_{\mathbf{a}}^2} + |E| \\
 &= \frac{2K_{\mathbf{a}}^2}{\Delta_{\mathbf{a}}^2} \log(T) + \mathcal{O} \left( \left( \bar{K}_{\mathbf{a}} + \frac{K_{\mathbf{a}}^2}{\Delta_{\mathbf{a}}^2} \right) \log \log T \right)
 \end{aligned}$$

and

$$\begin{aligned}
 R(T) &= \sum_{\mathbf{a} \in \mathcal{A}: \mu_{\mathbf{a}} \neq \mu^*} \Delta_{\mathbf{a}} \mathbb{E} \left[ \sum_{t=1}^T \mathbb{1} \{ \mathbf{a}(t) = \mathbf{a} \} \right] \\
 &\leq \sum_{\mathbf{a} \in \mathcal{A}: \mu_{\mathbf{a}} \neq \mu^*} \frac{2K_{\mathbf{a}}^2}{\Delta_{\mathbf{a}}} \log(T) + \mathcal{O} \left( \left( \bar{K}_{\mathbf{a}} \Delta_{\mathbf{a}} + \frac{K_{\mathbf{a}}^2}{\Delta_{\mathbf{a}}} \right) \log \log T \right) \\
 &= \mathcal{O} \left( \frac{|\mathcal{A}| K_{\max}^2}{\Delta_{\min}} \log T \right),
 \end{aligned}$$

which concludes the proof.  $\square$

## E. Proof of Lemma 2 (Upper-bound on the Number of Iterations of GRAB for which

$$\tilde{\mathbf{a}}(t) = \tilde{\mathbf{a}} \neq \mathbf{a}^*)$$

*Proof of Lemma 2.* Let  $\tilde{\mathbf{a}} \in \mathcal{P}_K^L \setminus \{\mathbf{a}^*\}$  and prove that  $\mathbb{E} \left[ \sum_{t=1}^T \mathbb{1}\{\tilde{\mathbf{a}}(t) = \tilde{\mathbf{a}}\} \right] = \mathcal{O}(\log \log T)$ .

The proof requires notations related to the neighborhood of  $\tilde{\mathbf{a}}$ . Let  $\mathcal{N} \stackrel{def}{=} \bigcup_{\pi \in \mathcal{P}_K^K} \mathcal{N}_\pi(\tilde{\mathbf{a}})$  be the set of all the potential neighbors of  $\tilde{\mathbf{a}}$ . By definition of the neighborhoods,

$$\mathcal{N} = \{\tilde{\mathbf{a}} \circ (k, k') : k, k' \in [K]^2, k > k'\} \cup \{\tilde{\mathbf{a}}[k := i] : k \in [K], i \in [L] \setminus \tilde{\mathbf{a}}([K])\},$$

and its size is  $N = K(2L - K - 1)/2$ . As  $\tilde{\mathbf{a}}$  is sub-optimal, and due to Assumption 1, for any appropriate ranking of positions  $\pi \in \Pi_\rho(\tilde{\mathbf{a}})$ , there exists a recommendation  $\mathbf{a}^+$  with a strictly better expected reward than  $\tilde{\mathbf{a}}$  in the neighborhood  $\mathcal{N}_\pi(\tilde{\mathbf{a}})$ . We denote

$$\mathcal{N}^+ \stackrel{def}{=} \bigcup_{\pi \in \Pi_\rho(\tilde{\mathbf{a}})} \left\{ \mathbf{a}^+ \in \mathcal{N}_\pi(\tilde{\mathbf{a}}) : \mu_{\mathbf{a}^+} = \max_{\mathbf{a} \in \mathcal{N}_\pi(\tilde{\mathbf{a}})} \mu_{\mathbf{a}} \right\}$$

the set of such recommendations. We also chose  $\epsilon < \min\{1/(2N), 1/L\}$  and note

$$\delta \stackrel{def}{=} \min_{\pi \in \Pi_\rho(\tilde{\mathbf{a}})} \min_{\mathbf{a} \in \mathcal{N}_\pi(\tilde{\mathbf{a}}) \cup \{\tilde{\mathbf{a}}\} \setminus \mathcal{N}^+} \left( \max_{\mathbf{a}' \in \mathcal{N}_\pi(\tilde{\mathbf{a}})} \mu_{\mathbf{a}'} - \mu_{\mathbf{a}} \right).$$

To bound  $\mathbb{E}[\mathbb{1}\{\tilde{\mathbf{a}}(t) = \tilde{\mathbf{a}}\}]$ , we use the decomposition  $\{t \in [T] : \tilde{\mathbf{a}}(t) = \tilde{\mathbf{a}}\} \subseteq \bigcup_{\mathbf{a}^+ \in \mathcal{N}^+} A_{\mathbf{a}^+} \cup B$  where for any permutation  $\mathbf{a}^+ \in \mathcal{N}^+$ ,

$$A_{\mathbf{a}^+} = \{t : \tilde{\mathbf{a}}(t) = \tilde{\mathbf{a}}, T_{\mathbf{a}^+}(t) \geq \epsilon \tilde{T}_{\tilde{\mathbf{a}}}(t)\}$$

and

$$B = \{t : \tilde{\mathbf{a}}(t) = \tilde{\mathbf{a}}, \forall \mathbf{a}^+ \in \mathcal{N}^+, T_{\mathbf{a}^+}(t) < \epsilon \tilde{T}_{\tilde{\mathbf{a}}}(t)\}.$$

Hence,

$$\mathbb{E}[\mathbb{1}\{\tilde{\mathbf{a}}(t) = \tilde{\mathbf{a}}\}] \leq \sum_{\mathbf{a}^+ \in \mathcal{N}^+} \mathbb{E}[|A_{\mathbf{a}^+}|] + \mathbb{E}[|B|].$$

**Bound on  $\mathbb{E}[|A_{\mathbf{a}^+}|]$**  Let  $\mathbf{a}^+$  be a permutation in  $\mathcal{N}^+$  and denote  $\mathcal{K}^+$  the set of positions for which  $\mathbf{a}^+$  and  $\tilde{\mathbf{a}}$  disagree:  $\mathcal{K}^+ = \{k \in [K] : a_k^+ \neq \tilde{a}_k\}$ . The permutation  $\mathbf{a}^+$  is in the neighborhood of  $\tilde{\mathbf{a}}$ , so either  $\mathbf{a}^+ = \tilde{\mathbf{a}} \circ (k, k')$  or  $\mathbf{a}^+ = \mathbf{a}[k := i]$ , with  $k$  and  $k'$  in  $[K]$ , and  $i$  in  $[L]$ . Overall,  $|\mathcal{K}^+| \leq 2$ .

By the design of the algorithm and by definition of  $\epsilon$ , we have that  $\forall t \in A_{\mathbf{a}^+}, T_{\tilde{\mathbf{a}}}(t) \geq \tilde{T}_{\tilde{\mathbf{a}}}(t)/L > \epsilon \tilde{T}_{\tilde{\mathbf{a}}}(t)$ . Moreover, at the considered iterations  $\tilde{\mathbf{a}}$  is the leader, so

$$\begin{aligned} A_{\mathbf{a}^+} &\subseteq \left\{ t : \tilde{\mathbf{a}}(t) = \tilde{\mathbf{a}}, \tilde{T}_{\tilde{\mathbf{a}}}(t) < \frac{1}{\epsilon} \right\} \cup \left\{ t : \tilde{\mathbf{a}}(t) = \tilde{\mathbf{a}}, \min\{T_{\tilde{\mathbf{a}}}(t), T_{\mathbf{a}^+}(t)\} \geq \epsilon \tilde{T}_{\tilde{\mathbf{a}}}(t) \geq 1, \sum_{\ell} \hat{\rho}_{\tilde{\mathbf{a}}_\ell, \ell}(t) \geq \sum_{\ell} \hat{\rho}_{\mathbf{a}^+_\ell, \ell}(t) \right\} \\ &\subseteq \left\{ t : \tilde{\mathbf{a}}(t) = \tilde{\mathbf{a}}, \tilde{T}_{\tilde{\mathbf{a}}}(t) < \frac{1}{\epsilon} \right\} \cup \left\{ t : \tilde{\mathbf{a}}(t) = \tilde{\mathbf{a}}, \min\{T_{\tilde{\mathbf{a}}}(t), T_{\mathbf{a}^+}(t)\} \geq \epsilon \tilde{T}_{\tilde{\mathbf{a}}}(t), \sum_{k \in \mathcal{K}^+} \hat{\rho}_{\tilde{\mathbf{a}}_k, k}(t) \geq \sum_{k \in \mathcal{K}^+} \hat{\rho}_{\mathbf{a}^+_k, k}(t) \right\} \\ &\subseteq \left\{ t : \tilde{\mathbf{a}}(t) = \tilde{\mathbf{a}}, \tilde{T}_{\tilde{\mathbf{a}}}(t) < \frac{1}{\epsilon} \right\} \\ &\quad \cup \left\{ t : \tilde{\mathbf{a}}(t) = \tilde{\mathbf{a}}, \min\{T_{\tilde{\mathbf{a}}}(t), T_{\mathbf{a}^+}(t)\} \geq \epsilon \tilde{T}_{\tilde{\mathbf{a}}}(t), \exists k \in \mathcal{K}^+, |\hat{\rho}_{\tilde{\mathbf{a}}_k, k}(t) - \rho_{\tilde{\mathbf{a}}_k, k}| \geq \frac{\delta}{2|\mathcal{K}^+|} \text{ or } |\hat{\rho}_{\mathbf{a}^+_k, k}(t) - \rho_{\mathbf{a}^+_k, k}| \geq \frac{\delta}{2|\mathcal{K}^+|} \right\} \\ &\subseteq \left\{ t : \tilde{\mathbf{a}}(t) = \tilde{\mathbf{a}}, \tilde{T}_{\tilde{\mathbf{a}}}(t) < \frac{1}{\epsilon} \right\} \cup \bigcup_{k \in \mathcal{K}^+} \bigcup_{i \in \{\tilde{\mathbf{a}}_k, \mathbf{a}^+_k\}} \Lambda_{i, k}, \end{aligned}$$

with  $\Lambda_{i,k} \stackrel{def}{=} \left\{ t : \tilde{\mathbf{a}}(t) = \tilde{\mathbf{a}}, \min\{T_{\tilde{\mathbf{a}}}(t), T_{\mathbf{a}^+}(t)\} \geq \epsilon \tilde{T}_{\tilde{\mathbf{a}}}(t), |\hat{\rho}_{i,k}(t) - \rho_{i,k}| \geq \frac{\delta}{2|\mathcal{K}^+|} \right\}$ .

Fix  $k$  in  $\mathcal{K}^+$  and  $i$  in  $\{\tilde{a}_k, a_k^+\}$ .  $\Lambda_{i,k} \subseteq \bigcup_{s \in \mathbb{N}} \Lambda_{i,k}(s)$ , with  $\Lambda_{i,k}(s) \stackrel{def}{=} \{t \in \Lambda_{i,k} : \tilde{T}_{\tilde{\mathbf{a}}}(t) = s\}$ .  $|\Lambda_{i,k}(s)| \leq 1$  as  $\tilde{T}_{\tilde{\mathbf{a}}}(t)$  increases for each  $t \in \Lambda_{i,k}$ . Note that for each  $s \in \mathbb{N}$  and  $n \in \Lambda_{i,k}(s)$ ,  $T_{i,k}(n) \geq \min\{T_{\tilde{\mathbf{a}}}(n), T_{\mathbf{a}^+}(n)\} \geq \epsilon \tilde{T}_{\tilde{\mathbf{a}}}(n) = \epsilon s$ . Then, by Lemma 4

$$\begin{aligned} \mathbb{E}[|\Lambda_{i,k}|] &= \mathbb{E}\left[\sum_{t=1}^T \mathbb{1}\{t \in \Lambda_{i,k}\}\right] \\ &= \mathbb{E}\left[\sum_{t=1}^T \mathbb{1}\left\{t \in \Lambda_{i,k}, |\hat{\rho}_{i,k}(t) - \rho_{i,k}| > \frac{\delta}{2|\mathcal{K}^+|}\right\}\right] \\ &\leq \frac{4|\mathcal{K}^+|^2}{\epsilon \delta^2} \end{aligned}$$

Hence,  $\mathbb{E}[|A_{\mathbf{a}^+}|] \leq \frac{1}{\epsilon} + \sum_{k \in \mathcal{K}^+} \sum_{i \in \{\tilde{a}_k, a_k^+\}} \mathbb{E}[|\Lambda_{i,k}|] \leq \frac{1}{\epsilon} + \frac{8|\mathcal{K}^+|^3}{\epsilon \delta^2}$ .

**Bound on  $\mathbb{E}[|B|]$**  We first split  $B$  in two parts:  $B = B^{t_0} \cup B_{t_0}^T$ , where  $B^{t_0} \stackrel{def}{=} \{t \in B : \tilde{T}_{\tilde{\mathbf{a}}}(t) \leq t_0\}$ ,  $B_{t_0}^T \stackrel{def}{=} \{t \in B : \tilde{T}_{\tilde{\mathbf{a}}}(t) > t_0\}$ , and  $t_0$  is chosen as small as possible to satisfy three constraints required in the rest of the proof.

Namely,  $t_0 = \max\left\{\frac{1}{\epsilon}, (1+N)(1 - \frac{1}{L} - \epsilon N)^{-1}, \inf\left\{t : 2\sqrt{\frac{\log(t+1)+3\log(\log(t+1))}{2\epsilon t}} < \frac{\delta}{8}\right\}\right\}$ . Note that  $t_0$  only depends on  $K, L$  and  $\delta$ , and that  $(1 - \frac{1}{L} - \epsilon N) > 0$  (assuming  $L \geq 2$ ) as  $\epsilon < 1/(2N)$ .

We also define

- $D \stackrel{def}{=} \bigcup_{(\mathbf{a},k) \in (\mathcal{N} \cup \{\tilde{\mathbf{a}}\}) \times [\mathcal{K}]} D_{\mathbf{a},k}$ , where  $D_{\mathbf{a},k} \stackrel{def}{=} \{t \in [T] : \tilde{\mathbf{a}}(t) = \tilde{\mathbf{a}}, \mathbf{a}(t) = \mathbf{a}, |\hat{\rho}_{\mathbf{a},k}(t) - \rho_{\mathbf{a},k}| \geq \frac{\delta}{8}\}$ ,
- $E \stackrel{def}{=} \bigcup_{(\mathbf{a}^+,k) \in \mathcal{N}^+ \times [\mathcal{K}]} E_{\mathbf{a}^+,k}$ , where  $E_{\mathbf{a}^+,k} \stackrel{def}{=} \{t \in [T] : \tilde{\mathbf{a}}(t) = \tilde{\mathbf{a}}, b_{\mathbf{a}^+,k}(t) \leq \rho_{\mathbf{a}^+,k}\}$ ,
- and  $F \stackrel{def}{=} \{t \in [T] : \tilde{\mathbf{a}}(t) = \tilde{\mathbf{a}}, \tilde{\pi}(t) \notin \Pi_{\rho}(\tilde{\mathbf{a}})\}$ .

Let  $t \in B_{t_0}^T$ . By construction, GRAB forces itself to select  $\left\lceil \frac{\tilde{T}_{\tilde{\mathbf{a}}}(t)}{L} \right\rceil$  times the leader  $\tilde{\mathbf{a}}$  between iterations 1 and  $t-1$ . So,

$$\tilde{T}_{\tilde{\mathbf{a}}}(t) = \left\lceil \frac{\tilde{T}_{\tilde{\mathbf{a}}}(t)}{L} \right\rceil + \sum_{\mathbf{a} \in \mathcal{N} \cup \{\tilde{\mathbf{a}}\}} T_{\mathbf{a}}^{\tilde{\mathbf{a}}}(t)$$

where  $T_{\mathbf{a}}^{\tilde{\mathbf{a}}}(t) = \sum_{s=1}^{t-1} \mathbb{1}\{\tilde{\mathbf{a}}(s) = \tilde{\mathbf{a}}, \mathbf{a}(s) = \mathbf{a}, \tilde{T}_{\tilde{\mathbf{a}}}(s)/L \notin \mathbb{N}\}$  is the number of times arm  $\mathbf{a} \in \mathcal{N} \cup \{\tilde{\mathbf{a}}\}$  has been played **normally** (i.e not forced) while  $\tilde{\mathbf{a}}$  was leader, up to time  $t-1$ . Let prove by contradiction that there is at least one recommendation  $\mathbf{a}$  that has been selected **normally** more than  $\epsilon \tilde{T}_{\tilde{\mathbf{a}}}(t) + 1$  times, namely  $T_{\mathbf{a}}^{\tilde{\mathbf{a}}}(t) \geq \epsilon \tilde{T}_{\tilde{\mathbf{a}}}(t) + 1$ .

Assume that for each recommendation  $\mathbf{a}$  in  $\mathcal{N} \cup \{\tilde{\mathbf{a}}\}$ ,  $T_{\mathbf{a}}^{\tilde{\mathbf{a}}}(t) < \epsilon \tilde{T}_{\tilde{\mathbf{a}}}(t) + 1$ . Then

$$\begin{aligned} \tilde{T}_{\tilde{\mathbf{a}}}(t) &= \left\lceil \frac{\tilde{T}_{\tilde{\mathbf{a}}}(t)}{L} \right\rceil + \sum_{\mathbf{a} \in \mathcal{N} \cup \{\tilde{\mathbf{a}}\}} T_{\mathbf{a}}^{\tilde{\mathbf{a}}}(t) \\ &< 1 + \frac{\tilde{T}_{\tilde{\mathbf{a}}}(t)}{L} + N(\epsilon \tilde{T}_{\tilde{\mathbf{a}}}(t) + 1). \end{aligned}$$

Therefore  $\tilde{T}_{\tilde{\mathbf{a}}}(t)(1 - \frac{1}{L} - N\epsilon) < 1 + N$ , which contradicts  $t \in B_{t_0}^T$ .

So, there exists a recommendation  $\mathbf{a}$  such that  $T_{\mathbf{a}}^{\tilde{\mathbf{a}}}(t) \geq \epsilon \tilde{T}_{\tilde{\mathbf{a}}}(t) + 1$ . Let denote  $s'$  the first iteration such that  $T_{\mathbf{a}}^{\tilde{\mathbf{a}}}(s') \geq \epsilon \tilde{T}_{\tilde{\mathbf{a}}}(t) + 1$ . At this iteration,  $T_{\mathbf{a}}^{\tilde{\mathbf{a}}}(s') = T_{\mathbf{a}}^{\tilde{\mathbf{a}}}(s' - 1) + 1$ , meaning that  $\tilde{\mathbf{a}}(s' - 1) = \tilde{\mathbf{a}}, \mathbf{a}(s' - 1) = \mathbf{a}, \tilde{T}_{\tilde{\mathbf{a}}}(s' - 1)/L \notin \mathbb{N}$ , and

$T_{\tilde{\mathbf{a}}}^{\tilde{\mathbf{a}}}(s' - 1) \geq \epsilon \tilde{T}_{\tilde{\mathbf{a}}}(t)$ . Therefore, the set  $\{s \in [t] : \tilde{\mathbf{a}}(s) = \tilde{\mathbf{a}}, T_{\tilde{\mathbf{a}}(s)}^{\tilde{\mathbf{a}}}(s) \geq \epsilon \tilde{T}_{\tilde{\mathbf{a}}}(t), \tilde{T}_{\tilde{\mathbf{a}}}(s)/L \notin \mathbb{N}\}$  is non-empty. We define  $\psi(t)$  as the minimum on this set

$$\psi(t) \stackrel{def}{=} \min \left\{ s \in [t] : \tilde{\mathbf{a}}(s) = \tilde{\mathbf{a}}, T_{\tilde{\mathbf{a}}(s)}^{\tilde{\mathbf{a}}}(s) \geq \epsilon \tilde{T}_{\tilde{\mathbf{a}}}(t), \tilde{T}_{\tilde{\mathbf{a}}}(s)/L \notin \mathbb{N} \right\}.$$

We note  $\mathbf{a}$  the recommendation  $\mathbf{a}(\psi(t))$  at iteration  $\psi(t)$ . We have  $\mathbf{a} \notin \mathcal{N}^+$  since for any recommendation  $\mathbf{a}^+ \in \mathcal{N}^+$ ,  $T_{\mathbf{a}^+}^{\tilde{\mathbf{a}}}(\psi(t)) \leq T_{\mathbf{a}^+}^{\tilde{\mathbf{a}}}(t) \leq T_{\mathbf{a}^+}(t) < \epsilon \tilde{T}_{\tilde{\mathbf{a}}}(t)$ . Let  $\mathbf{a}^+$  be one of the best recommendations in  $\mathcal{N}_{\tilde{\pi}(\psi(t))}(\tilde{\mathbf{a}}) \cup \{\tilde{\mathbf{a}}\}$ , meaning  $\mu_{\mathbf{a}^+} = \max_{\mathbf{a}' \in \mathcal{N}_{\tilde{\pi}(\psi(t))}(\tilde{\mathbf{a}}) \cup \{\tilde{\mathbf{a}}\}} \mu_{\mathbf{a}'}$ , and let  $\mathcal{K}$  denote the set of positions for which  $\mathbf{a}$  and  $\mathbf{a}^+$  disagree. As both recommendations are in  $\mathcal{N}_{\tilde{\pi}(\psi(t))}(\tilde{\mathbf{a}}) \cup \{\tilde{\mathbf{a}}\}$ ,  $|\mathcal{K}| \leq 4$ .

Let prove by contradiction that  $\psi(t) \in D \cup E \cup F$ . Assume that  $\psi(t) \notin D \cup E \cup F$ .

Since  $\psi(t) \notin F$ ,  $\tilde{\pi}(\psi(t))$  belongs to  $\Pi_{\rho}(\tilde{\mathbf{a}})$  and hence  $\mathbf{a}^+$  is in  $\mathcal{N}^+$  and  $\sum_k \rho_{a_k^+, k} - \sum_k \rho_{a_k, k} = \mu_{\mathbf{a}^+} - \mu_{\mathbf{a}} \geq \delta$ .

Moreover, since  $\psi(t) \notin D \cup E$ , for each position  $k \in [K]$ ,  $|\hat{\rho}_{a_k, k}(\psi(t)) - \rho_{a_k, k}| < \frac{\delta}{8}$ , and  $b_{a_k^+, k}(\psi(t)) > \rho_{a_k^+, k}$ .

Finally,  $T_{\mathbf{a}}(\psi(t)) \geq T_{\tilde{\mathbf{a}}}^{\tilde{\mathbf{a}}}(\psi(t)) \geq \epsilon \tilde{T}_{\tilde{\mathbf{a}}}(t) \geq 1$ , and therefore  $b_{a_k, k}(\psi(t))$  and  $\hat{\rho}_{a_k, k}(\psi(t))$  are properly defined for any position  $k \in [K]$ .

Then, by Pinsker's inequality and the fact that  $\psi(t) \leq t$ ,  $\tilde{T}_{\tilde{\mathbf{a}}}(s)$  is non-decreasing in  $s$ , and  $T_{\mathbf{a}}(\psi(t)) \geq \epsilon \tilde{T}_{\tilde{\mathbf{a}}}(t)$ ,

$$\begin{aligned} \sum_k b_{a_k, k}(\psi(t)) - \sum_k b_{a_k^+, k}(\psi(t)) &= \sum_{k \in \mathcal{K}} b_{a_k, k}(\psi(t)) - b_{a_k^+, k}(\psi(t)) \\ &\leq \sum_{k \in \mathcal{K}} \hat{\rho}_{a_k, k}(\psi(t)) + \sqrt{\frac{\log(\tilde{T}_{\tilde{\mathbf{a}}}(\psi(t)) + 1) + 3 \log(\log(\tilde{T}_{\tilde{\mathbf{a}}}(\psi(t)) + 1))}{2T_{\mathbf{a}}(\psi(t))}} - b_{a_k^+, k}(\psi(t)) \\ &< \sum_{k \in \mathcal{K}} \rho_{a_k, k} + \frac{\delta}{8} + \sqrt{\frac{\log(\tilde{T}_{\tilde{\mathbf{a}}}(t) + 1) + 3 \log(\log(\tilde{T}_{\tilde{\mathbf{a}}}(t) + 1))}{2\epsilon \tilde{T}_{\tilde{\mathbf{a}}}(t)}} - \rho_{a_k^+, k} \\ &\leq \sum_{k \in \mathcal{K}} \rho_{a_k, k} + \frac{\delta}{8} + \frac{\delta}{8} - \rho_{a_k^+, k} \\ &\leq \sum_k \rho_{a_k, k} - \sum_k \rho_{a_k^+, k} + |\mathcal{K}| \cdot 2\frac{\delta}{8} \\ &\leq -\delta + 8\frac{\delta}{8} \\ &= 0, \end{aligned}$$

which contradicts the fact that  $\mathbf{a}$  is played at iteration  $\psi(t)$ . So  $\psi(t) \in D \cup E \cup F$ .

Overall, for any  $t \in B_{t_0}^T$ ,  $\psi(t) \in D \cup E \cup F$ . So,  $B_{t_0}^T \subseteq \bigcup_{n \in D \cup E \cup F} B_{t_0}^T \cap \{t \in [T] : \psi(t) = n\}$ . Let  $n$  be in  $D \cup E \cup F$ . For any  $t$  in  $B_{t_0}^T \cap \{t \in [T] : \psi(t) = n\}$ ,  $T_{\tilde{\mathbf{a}}(n)}^{\tilde{\mathbf{a}}}(n) = \lceil \epsilon \tilde{T}_{\tilde{\mathbf{a}}}(t) \rceil$  and  $\tilde{T}_{\tilde{\mathbf{a}}}(t+1) = \tilde{T}_{\tilde{\mathbf{a}}}(t) + 1$ . So  $|B_{t_0}^T \cap \{t \in [T] : \psi(t) = n\}| < 1/\epsilon + 1$ . Overall,

$$\mathbb{E}[|B|] \leq t_0 + \mathbb{E}[|B_{t_0}^T|] \leq t_0 + (1/\epsilon + 1)(\mathbb{E}[|D|] + \mathbb{E}[|E|] + \mathbb{E}[|F|]).$$

It remains to upper-bound  $\mathbb{E}[|D|]$ ,  $\mathbb{E}[|E|]$ , and  $\mathbb{E}[|F|]$  to conclude the proof.

**Bound on  $\mathbb{E}[|D|]$**  The upper-bound on  $\mathbb{E}[|D|]$  is obtained with the same strategy as the last step in the proof of the upper-bound on  $\mathbb{E}[|A_{\mathbf{a}^+}|]$ . Let  $\mathbf{a}$  be a recommendation in  $\mathcal{N} \cup \{\tilde{\mathbf{a}}\} \setminus \mathcal{N}^+$ , and  $k \in [K]$  be a position.  $D_{\mathbf{a}, k} \subseteq \bigcup_{s \in \mathbb{N}} \Lambda_{\mathbf{a}, k}(s)$ , where  $\Lambda_{\mathbf{a}, k}(s) \stackrel{def}{=} \{t \in D_{\mathbf{a}, k} : T_{\mathbf{a}}(t) = s\}$ .  $|\Lambda_{\mathbf{a}, k}(s)| \leq 1$  as  $T_{\mathbf{a}}(t)$  increases for each  $t \in D_{\mathbf{a}, k}$ . Note that for each  $s \in \mathbb{N}$  and  $n \in \Lambda_{\mathbf{a}, k}(s)$ ,  $T_{a_k, k}(n) \geq T_{\mathbf{a}}(n) = s$ . Then, by Lemma 4

$$\begin{aligned}
 \mathbb{E}[|D_{\mathbf{a},k}|] &\leq \mathbb{E}\left[\sum_{t=1}^T \mathbb{1}\{t \in D_{\mathbf{a},k}\}\right] \\
 &= \mathbb{E}\left[\sum_{t=1}^T \mathbb{1}\left\{t \in D_{\mathbf{a},k}, |\hat{\rho}_{a_k,k}(t) - \rho_{a_k,k}| \geq \frac{\delta}{8}\right\}\right] \\
 &\leq \frac{64}{\delta^2}
 \end{aligned}$$

Hence,  $\mathbb{E}[|D|] \leq \sum_{(\mathbf{a},k) \in (\mathcal{N} \cup \{\tilde{\mathbf{a}}\} \setminus \mathcal{N}^+) \times [K]} \mathbb{E}[|D_{\mathbf{a},k}|] \leq \frac{64(N+1)K}{\delta^2}$ .

**Bound on  $\mathbb{E}[|E|]$**  By Theorem 10 of (Garivier & Cappé, 2011),  $\mathbb{E}[|E_{\mathbf{a}^+,k}|] = O(\log(\log(T)))$ , so  $\mathbb{E}[|E|] \leq \sum_{(\mathbf{a}^+,k) \in \mathcal{N}^+ \times [K]} \mathbb{E}[|E_{\mathbf{a}^+,k}|] = O(|\mathcal{N}^+|K \log(\log(T)))$ .

**Bound on  $\mathbb{E}[|F|]$**  By Lemma 3,  $\mathbb{E}[|F|] = \mathbb{E}\left[\sum_{t=1}^T \mathbb{1}\{\tilde{\mathbf{a}}(t) = \tilde{\mathbf{a}}, \tilde{\pi}(t) \notin \Pi_{\rho}(\tilde{\mathbf{a}})\}\right] = \mathcal{O}(1)$ .

Overall  $\mathbb{E}[\mathbb{1}\{\tilde{\mathbf{a}}(t) = \tilde{\mathbf{a}}\}] \leq \frac{|\mathcal{K}^+|}{\epsilon} + \frac{8|\mathcal{K}^+|^3|\mathcal{N}^+|}{\epsilon\delta^2} + t_0 + \left(\frac{1}{\epsilon} + 1\right) \frac{64(N+1)K}{\delta^2} + \mathcal{O}\left(\frac{|\mathcal{N}^+|K}{\epsilon} \log \log T\right) + \mathcal{O}(1) = \mathcal{O}\left(\frac{|\mathcal{N}^+|K}{\epsilon} \log \log T\right)$ , which concludes the proof.  $\square$

## F. Proof of Lemma 3 (Upper-bound on the Number of Iterations of GRAB for which $\tilde{\pi}(t) \notin \Pi_{\rho}(\tilde{\mathbf{a}})$ )

*Proof of Theorem 3.* Let  $\tilde{\mathbf{a}}$  be a  $K$ -permutation of  $L$  items. If  $\Pi_{\rho}(\tilde{\mathbf{a}})$  contains all the permutations of  $K$  elements, the set  $\{t : \tilde{\mathbf{a}}(t) = \tilde{\mathbf{a}}, \tilde{\pi}(t) \notin \Pi_{\rho}(\tilde{\mathbf{a}})\}$  is empty.

Otherwise, let denote  $\delta$  the smallest non-zero gap between the probability of click at position  $k$  and the probability of click at position  $k' \neq k$ :  $\delta \stackrel{def}{=} \min\{\rho_{\tilde{a}_k,k} - \rho_{\tilde{a}_{k'},k'} : (k, k') \in [K]^2, \rho_{\tilde{a}_k,k} - \rho_{\tilde{a}_{k'},k'} > 0\}$ . The gap  $\delta$  is the minimum on a finite set, so  $\delta > 0$ .

By definition of  $\tilde{\pi}(t)$ ,  $\hat{\rho}_{\tilde{a}_{\tilde{\pi}_1(t)}, \tilde{\pi}_1(t)}(t) \geq \hat{\rho}_{\tilde{a}_{\tilde{\pi}_2(t)}, \tilde{\pi}_2(t)}(t) \geq \dots \geq \hat{\rho}_{\tilde{a}_{\tilde{\pi}_K(t)}, \tilde{\pi}_K(t)}(t)$ , so,

$$\begin{aligned}
 \{t : \tilde{\mathbf{a}}(t) = \tilde{\mathbf{a}}, \tilde{\pi}(t) \notin \Pi_{\rho}(\tilde{\mathbf{a}})\} &= \bigcup_{\tilde{\pi} \in \mathcal{P}_K^K} \bigcup_{k \in [K-1]} \left\{t : \tilde{\mathbf{a}}(t) = \tilde{\mathbf{a}}, \tilde{\pi}(t) = \tilde{\pi}, \rho_{\tilde{a}_{\tilde{\pi}_k}, \tilde{\pi}_k} < \rho_{\tilde{a}_{\tilde{\pi}_{k+1}}, \tilde{\pi}_{k+1}}\right\} \\
 &\subseteq \bigcup_{\tilde{\pi} \in \mathcal{P}_K^K} \bigcup_{k \in [K-1]} \left\{t : \tilde{\mathbf{a}}(t) = \tilde{\mathbf{a}}, \tilde{\pi}(t) = \tilde{\pi}, \text{ or } |\hat{\rho}_{\tilde{a}_{\tilde{\pi}_k}, \tilde{\pi}_k}(t) - \rho_{\tilde{a}_{\tilde{\pi}_k}, \tilde{\pi}_k}| > \frac{\delta}{2}, \text{ or } |\hat{\rho}_{\tilde{a}_{\tilde{\pi}_{k+1}}, \tilde{\pi}_{k+1}}(t) - \rho_{\tilde{a}_{\tilde{\pi}_{k+1}}, \tilde{\pi}_{k+1}}| > \frac{\delta}{2}\right\} \\
 &= \bigcup_{\tilde{\pi} \in \mathcal{P}_K^K} \bigcup_{k \in [K]} \Lambda_{\tilde{\pi},k},
 \end{aligned}$$

with  $\Lambda_{\tilde{\pi},k} \stackrel{def}{=} \left\{t : \tilde{\mathbf{a}}(t) = \tilde{\mathbf{a}}, \tilde{\pi}(t) = \tilde{\pi}, |\hat{\rho}_{\tilde{a}_{\tilde{\pi}_k}, \tilde{\pi}_k}(t) - \rho_{\tilde{a}_{\tilde{\pi}_k}, \tilde{\pi}_k}| > \frac{\delta}{2}\right\}$ , for any ranking of positions  $\tilde{\pi} \in \mathcal{P}_K^K$  and any rank  $k \in [K]$ .

Let  $\tilde{\pi} \in \mathcal{P}_K^K$  be a ranking of positions, and  $k \in [K]$  be a rank.  $\Lambda_{\tilde{\pi},k} \subseteq \bigcup_{s \in \mathbb{N}} \Lambda_{\tilde{\pi},k}(s)$ , with  $\Lambda_{\tilde{\pi},k}(s) \stackrel{def}{=} \{t \in \Lambda_{\tilde{\pi},k} : \tilde{T}_{\tilde{\mathbf{a}}}(t) = s\}$ .  $|\Lambda_{\tilde{\pi},k}(s)| \leq 1$  as  $\tilde{T}_{\tilde{\mathbf{a}}}(t)$  increases for each  $t \in \Lambda_{\tilde{\pi},k}$ . Note that for each  $s \in \mathbb{N}$  and  $n \in \Lambda_{\tilde{\pi},k}(s)$ ,  $T_{\tilde{a}_{\tilde{\pi}_k}, \tilde{\pi}_k}(n) \geq$

**Algorithm 2** KL-ComUCB1 (generic version)

---

**Input:** set of elements  $E$ , set of arms  $\mathcal{A}$

$t \leftarrow 1$

**while**  $\{e \in E : T_e(t) = 0\} \neq \emptyset$  **do**

$\tilde{E} \leftarrow \{e \in E : T_e(t) = 0\}$

$\tilde{\mathcal{A}} \leftarrow \{\mathbf{a} \in \mathcal{A} : \mathbf{a} \cap \tilde{E} \neq \emptyset\}$

recommend  $\mathbf{a}(t) = \operatorname{argmax}_{\mathbf{a} \in \tilde{\mathcal{A}}} \sum_{e \in \mathbf{a}} b_e(t)$

observe the weights  $[w_e(t) : e \in \mathbf{a}]$

$t \leftarrow t + 1$

**end while**

$t_0 \leftarrow t$

**for**  $t = t_0, t_0 + 1, \dots$  **do**

recommend  $\mathbf{a}(t) = \operatorname{argmax}_{\mathbf{a} \in \mathcal{A}} \sum_{e \in \mathbf{a}} b_e(t)$

observe the weights  $[w_e(t) : e \in \mathbf{a}]$

**end for**

---

$T_{\tilde{\mathbf{a}}}(n) \geq \tilde{T}_{\tilde{\mathbf{a}}}(n)/L = s/L$ . Then, by Lemma 4

$$\begin{aligned} \mathbb{E} [|\Lambda_{\tilde{\pi}, k}|] &= \mathbb{E} \left[ \sum_{t=1}^T \mathbb{1}\{t \in \Lambda_{\tilde{\pi}, k}\} \right] \\ &= \mathbb{E} \left[ \sum_{t=1}^T \mathbb{1} \left\{ t \in \Lambda_{\tilde{\pi}, k}, |\hat{\rho}_{\tilde{\mathbf{a}}_{\tilde{\pi}, k}, \tilde{\pi}_k}(t) - \rho_{\tilde{\mathbf{a}}_{\tilde{\pi}, k}, \tilde{\pi}_k}| > \frac{\delta}{2} \right\} \right] \\ &\leq \frac{4L}{\delta^2} \end{aligned}$$

Hence,

$$\begin{aligned} \mathbb{E} \left[ \sum_{t=1}^T \mathbb{1}\{\tilde{\mathbf{a}}(t) = \tilde{\mathbf{a}}, \tilde{\pi}(t) \notin \Pi_{\rho}(\tilde{\mathbf{a}})\} \right] &\leq \sum_{\tilde{\pi} \in \mathcal{P}_K^K} \sum_{k \in [K]} \mathbb{E} [|\Lambda_{\tilde{\pi}, k}|] \\ &\leq \frac{4LKK!}{\delta^2} \\ &= \mathcal{O}(LKK!), \end{aligned}$$

which concludes the proof. □

## G. KL-CombUCB and its Application to PBM Setting

In this section we first define the generic combinatorial semi-bandit algorithm KL-CombUCB and we compare two upper-bounds on its regret. Then, we present the application of KL-CombUCB to PBM setting and discuss its relation to GRAB.

### G.1. KL-CombUCB for Generic Setting

CombUCB1 (Kveton et al., 2015) is a bandit algorithm handling the following combinatorial setting. Let  $E$  be a set of elements and  $\mathcal{A} \subseteq \{0, 1\}^E$  be a set of arms, where each arm  $\mathbf{a}$  is a subset of  $E$ . Following the terminology used in (Kveton et al., 2015),  $E$  is the *ground set* and  $\mathcal{A}$  the *feasible set*. At each iteration, the bandit algorithm chooses a subset of elements  $\mathbf{a} \in \mathcal{A}$  and receives the reward  $\sum_{e \in \mathbf{a}} w_e$ , where  $\mathbf{w}$  is an independent draw of a distribution  $\nu$  on  $[0, 1]^E$ . Given these assumptions, CombUCB1 chooses an arm  $\mathbf{a}(t)$  at each iteration, aiming at minimizing the total regret defined as usual.

**Algorithm 3** KL-ComUCB1 (applied to PBM)

---

**Input:** number of items  $L$ , number of positions  $K$

**for**  $t = 1, 2, \dots, L$  **do**

recommend  $\mathbf{a}(t) = (((t-1)\%L) + 1, (t\%L) + 1, \dots, ((t+K-2)\%L) + 1)$

observe the clicks-vector  $\mathbf{c}(t)$

**end for**

**for**  $t = L+1, L+2, \dots$  **do**

recommend  $\mathbf{a}(t) = \operatorname{argmax}_{\mathbf{a} \in \mathcal{P}_K^L} \sum_{k=1}^K b_{a_k, k}(t)$

observe the clicks-vector  $\mathbf{c}(t)$

**end for**

---

We denote  $\rho_e \stackrel{def}{=} \mathbb{E}_{\mathbf{w} \sim \nu} [w_e]$  the expected reward associated to element  $e$ ,  $\mu_{\mathbf{a}} \stackrel{def}{=} \mathbb{E}_{\mathbf{w} \sim \nu} [\sum_{e \in \mathbf{a}} w_e] = \sum_{e \in \mathbf{a}} \rho_e$  the expected reward when choosing the arm  $\mathbf{a} \in \mathcal{A}$ , and  $\mu^* \stackrel{def}{=} \max_{\mathbf{a} \in \mathcal{A}} \mu_{\mathbf{a}}$  the best expected reward. We also denote  $\Delta_{\mathbf{a}} \stackrel{def}{=} \mu^* - \mu_{\mathbf{a}}$  the gap between the best expected reward and the reward of an arm  $\mathbf{a}$ , and  $\Delta_{min} \stackrel{def}{=} \min_{\mathbf{a} \in \mathcal{A}: \Delta_{\mathbf{a}} > 0} \Delta_{\mathbf{a}}$  the smallest gap of a suboptimal arm. Finally,  $K \stackrel{def}{=} \max_{\mathbf{a} \in \mathcal{A}} |\mathbf{a}|$  denotes the maximum size of an arm (meaning the maximum number of chosen elements),  $K_{\mathbf{a}} \stackrel{def}{=} \min_{\mathbf{a}^* \in \mathcal{A}: \mu_{\mathbf{a}^*} = \mu^*} |\mathbf{a} \setminus \mathbf{a}^*|$  is the smallest number of elements to remove from  $\mathbf{a}$  to get an optimal arm, and  $K_{max} \stackrel{def}{=} \max_{\mathbf{a} \in \mathcal{A}: \mu_{\mathbf{a}} \neq \mu^*} K_{\mathbf{a}}$  is its larger value.

In our paper, we use the Kullback-Leibler variation of CombUCB1 which chooses the arm based on the index  $b_e(t)$  (defined hereafter) instead of the usual confidence upper-bound derived from the Hoeffding's inequality. The corresponding algorithm (KL-CombUCB) also assumes that the weight-vector  $\mathbf{w}(t)$  is in  $\{0, 1\}^E$ . KL-CombUCB is depicted by Algorithm 2 which uses the following notations. At each iteration  $t$ , we denote

$$\hat{\rho}_e(t) \stackrel{def}{=} \frac{1}{T_e(t)} \sum_{s=1}^{t-1} \mathbb{1}\{e \in \mathbf{a}(s)\} w_e(s)$$

the average number of clicks obtained by the element  $e$ , where

$$T_e(t) \stackrel{def}{=} \sum_{s=1}^{t-1} \mathbb{1}\{e \in \mathbf{a}(s)\}$$

is the number of times element  $e$  has been selected;  $\hat{\rho}_e(t) \stackrel{def}{=} 0$  when  $T_e(t) = 0$ . The statistics  $\hat{\rho}_e(t)$  are paired with their respective *indices*

$$b_e(t) \stackrel{def}{=} f(\hat{\rho}_e(t), T_e(t), t),$$

where  $f(\hat{\rho}, s, t)$  stands for

$$\sup\{p \in [\hat{\rho}, 1] : s \times \text{kl}(\hat{\rho}, p) \leq \log(t) + 3 \log(\log(t))\},$$

with

$$\text{kl}(p, q) \stackrel{def}{=} p \log\left(\frac{p}{q}\right) + (1-p) \log\left(\frac{1-p}{1-q}\right)$$

the *Kullback-Leibler divergence* from a Bernoulli distribution of mean  $p$  to a Bernoulli distribution of mean  $q$ ;  $f(\hat{\rho}, s, t) \stackrel{def}{=} 1$  when  $\hat{\rho} = 1$ ,  $s = 0$ , or  $t = 0$ .

Kveton et al. prove that the regret of CombUCB1 is upper-bounded by  $\mathcal{O}(|E|K/\Delta_{min} \log T)$ , and a similar proof would lead to the same upper-bound for KL-CombUCB. In our paper we prove in Theorem 2 a completely different regret upper-bound for KL-CombUCB:  $\mathcal{O}(|\mathcal{A}|K_{max}^2/\Delta_{min} \log T)$ . For most combinatorial bandit settings, this new bound is useless since  $|\mathcal{A}| \gg |E|$ , and  $K_{max} \approx K$ . However, the analysis of GRAB involves an application of KL-CombUCB to a setting where the new bound is smaller than the standard one as  $|\mathcal{A}| = |E| - 1$  and  $K_{max} = 2$ .

---

**Algorithm 4** S-GRAB: Static Graph for unimodal RAnking Bandit
 

---

**Input:** number of items  $L$ , number of positions  $K$

$$\gamma \leftarrow K(2L - K - 1)/2$$

**for**  $t = 1, 2, \dots$  **do**

$$\tilde{\mathbf{a}}(t) \leftarrow \operatorname{argmax}_{\mathbf{a} \in \mathcal{P}_K^L} \sum_{k=1}^K \hat{\rho}_{a_k, k}(t)$$

$$\text{recommend } \mathbf{a}(t) = \begin{cases} \tilde{\mathbf{a}}(t) & , \text{ if } \frac{\tilde{T}_{\tilde{\mathbf{a}}(t)}(t)}{\gamma+1} \in \mathbb{N}, \\ \operatorname{argmax}_{\mathbf{a} \in \{\tilde{\mathbf{a}}(t)\} \cup \mathcal{N}_G(\tilde{\mathbf{a}}(t))} \sum_{k=1}^K b_{a_k, k}(t) & , \text{ otherwise} \end{cases}$$

where  $\mathcal{N}_G(\mathbf{a}) = \{\mathbf{a} \circ (k, k') : k, k' \in [K]^2, k > k'\} \cup \{\mathbf{a}[k := i] : k \in [K], i \in [L] \setminus \mathbf{a}([K])\}$   
 observe the clicks vector  $\mathbf{c}(t)$

**end for**

---

## G.2. KL-CombUCB Applied to PBM Setting

In the experiments (Section 6), we apply KL-CombUCB to PBM bandit setting by choosing the *ground set*  $E = [L] \times [K]$ , the *feasible set*  $\Theta = \{(a_k, k) : k \in [K]\} : \mathbf{a} \in \mathcal{P}_K^L$ , and the *expected weights*  $\rho_{(i,k)} = \theta_i \kappa_k$  for any “element”  $(i, k) \in E$ . Note that the observed weights of the generic setting correspond to the clicks-vector in the PBM setting.

The corresponding algorithm, depicted by Algorithm 3, recommends at each iteration  $t$  the best permutation given the indices  $b_{i,k}(t)$  defined for GRAB. This optimization problem is a *linear sum assignment problem* which is solvable in  $\mathcal{O}(K^2(L + \log K))$  time (Ramshaw & Tarjan, 2012). Note the close relationship with GRAB:

- both algorithms solve a linear sum assignment problem, they only differ from the metric to optimize:  $\sum_{k=1}^K \hat{\rho}_{a_k, k}(t)$  for GRAB vs.  $\sum_{k=1}^K b_{a_k, k}(t)$  for KL-CombUCB;
- both algorithms recommend the best permutation  $\mathbf{a}$  regarding  $\sum_{k=1}^K b_{a_k, k}(t)$ , they only differ from the considered set of permutations:  $\{\tilde{\mathbf{a}}(t)\} \cup \mathcal{N}_{\tilde{\pi}(t)}(\tilde{\mathbf{a}}(t))$  for GRAB vs.  $\mathcal{P}_K^L$  for KL-CombUCB.

By considering a larger set of permutations, KL-CombUCB1 suffers a  $\mathcal{O}(LK^2/\Delta_{\min} \log T)$  regret (by applying (Kveton et al., 2015) bound), which is higher than the upper-bound on the regret of GRAB by a factor  $K^2$ .

## H. S-GRAB: OSUB on a Static Graph

The algorithm S-GRAB, depicted in Algorithm 4, is similar to GRAB except that it explores a static graph  $G = (E, V)$  defined by

$$V \stackrel{\text{def}}{=} \mathcal{P}_K^L,$$

$$E \stackrel{\text{def}}{=} \{(\mathbf{a}, \mathbf{a} \circ (k, k')) : k, k' \in [K]^2, k > k'\} \cup \{(\mathbf{a}, \mathbf{a}[k := i]) : k \in [K], i \in [L] \setminus \mathbf{a}([K])\}.$$

This graph is chosen to ensure that with PBM setting any sub-optimal recommendation has a strictly better recommendation in its neighborhood given  $G$ . This graph is fixed and does not require the knowledge of a mapping  $\mathcal{P}$ , but its degree is also about  $K$  times larger than the degree of the graphs handled by GRAB.

As for GRAB, any recommendation in the neighborhood of the leader given  $G$  differs with the leader at, at most two positions. Therefore a proof similar to the one of Theorem 1 ensures that S-GRAB’s regret is upper-bounded by  $\mathcal{O}(LK/\Delta_{\min} \log T)$ . This regret upper-bound is higher than GRAB’s one by a factor  $K$  due to the larger size of the considered neighborhoods. However, this regret remains smaller than KL-CombUCB’s one by a factor  $K$  thanks to the bounded number of differences between the leader and the arm played.

## References

- Combes, R. and Proutière, A. Unimodal bandits: Regret lower bounds and optimal algorithms. In *proc. of the 31st Int. Conf. on Machine Learning, ICML'14*, 2014.
- Garivier, A. and Cappé, O. The kl-ucb algorithm for bounded stochastic bandits and beyond. In *proc. of the 24th Annual Conf. on Learning Theory, COLT'11*, 2011.
- Kveton, B., Wen, Z., Ashkan, A., and Szepesvari, C. Tight Regret Bounds for Stochastic Combinatorial Semi-Bandits. In *proc. of the 18th Int. Conf. on Artificial Intelligence and Statistics, AISTATS'15*, 2015.
- Ramshaw, L. and Tarjan, R. E. On minimum-cost assignments in unbalanced bipartite graphs. Technical report, HP research labs, 2012.
